# Supplementary material
Source: PubMed Central journal article supplement (PMC9984631)
Supplement: 10278_2022_719_MOESM1_ESM.pdf [file 10278_2022_719_MOESM1_ESM.pdf]

An Explainable Convolutional Neural Network for the Early  
Diagnosis of Alzheimer’s Disease from 18F-FDG PET  
Supplementary Materials

**CNN Architecture**

| CNN Architecture   |           |          |           |                    |           |
|--------------------|-----------|----------|-----------|--------------------|-----------|
| Layer              | Kernel    | n° units | Stride    | Output Shape       | n° params |
| Input              |           |          |           | 160 x 160 x 96 x 1 | 0         |
| Conv 3D + ReLU     | 3 x 3 x 3 | 8        | 1 x 1 x 1 | 160 x 160 x 96 x 8 | 224       |
| Conv 3D + ReLU     | 3 x 3 x 3 | 8        | 1 x 1 x 1 | 160 x 160 x 96 x 8 | 1736      |
| Max Pool 3D        | 3 x 3 x 3 |          | 1 x 1 x 1 | 53 x 53 x 32 x 8   | 0         |
| Batch Norm         |           |          |           | 53 x 53 x 32 x 8   | 32        |
| Conv 3D + ReLU     | 3 x 3 x 3 | 16       | 1 x 1 x 1 | 53 x 53 x 32 x 16  | 3472      |
| Conv 3D + ReLU     | 3 x 3 x 3 | 16       | 1 x 1 x 1 | 53 x 53 x 32 x 16  | 6928      |
| Max Pool 3D        | 3 x 3 x 3 |          | 1 x 1 x 1 | 17 x 17 x 10 x 16  | 0         |
| Batch Norm         |           |          |           | 17 x 17 x 10 x 16  | 64        |
| Conv 3D + ReLU     | 3 x 3 x 3 | 32       | 1 x 1 x 1 | 17 x 17 x 10 x 32  | 13856     |
| Conv 3D + ReLU     | 3 x 3 x 3 | 32       | 1 x 1 x 1 | 17 x 17 x 10 x 32  | 27680     |
| Max Pool 3D        | 2 x 2 x 2 |          | 1 x 1 x 1 | 8 x 8 x 5 x 32     | 0         |
| Batch Norm         |           |          |           | 8 x 8 x 5 x 32     | 128       |
| Conv 3D + ReLU     | 3 x 3 x 3 | 64       | 1 x 1 x 1 | 8 x 8 x 5 x 64     | 55360     |
| Conv 3D + ReLU     | 3 x 3 x 3 | 64       | 1 x 1 x 1 | 8 x 8 x 5 x 64     | 110656    |
| Max Pool 3D        | 2 x 2 x 2 |          | 1 x 1 x 1 | 4 x 4 x 2 x 64     | 0         |
| Batch Norm         |           |          |           | 4 x 4 x 2 x 64     | 256       |
| Global Avg Pool 3D |           |          |           | 64                 | 0         |
| FC + ReLU          |           | 64       |           | 64                 | 4160      |
| Dropout, p=0.3     |           |          |           | 64                 | 0         |
| FC + ReLU          |           | 32       |           | 32                 | 2080      |
| Dropout, p=0.3     |           |          |           | 32                 | 0         |
| FC + Softmax       |           | 3        |           | 3                  | 99        |

Table 1: Convolutional Neural Network architectures
